# Supplementary material
Source: PubMed Central journal article supplement (PMC8753569)
Supplement: mmc1.pdf [file mmc1.pdf]

## **Supplemental Information**

### **Combination of lentiviral and genome editing technologies for the treatment of sickle cell disease**

**Sophie Ramadier, Anne Chalumeau, Tristan Felix, Nadia Othman, Sherazade Aknoun, Antonio Casini, Giulia Maule, Cecile Masson, Anne De Cian, Giacomo Frati, Megane Brusson, Jean-Paul Concordet, Marina Cavazzana, Anna Cereseto, Wassim El Nemer, Mario Amendola, Benoit Wattellier, Vasco Meneghini, and Annarita Miccio**



**A****Infectious titer**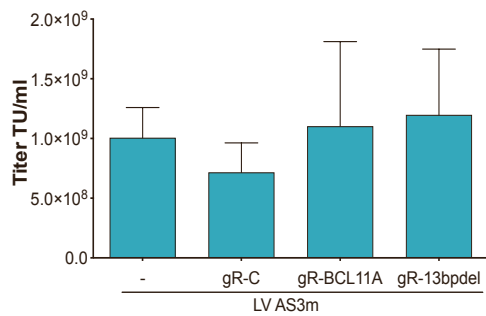**Infectivity**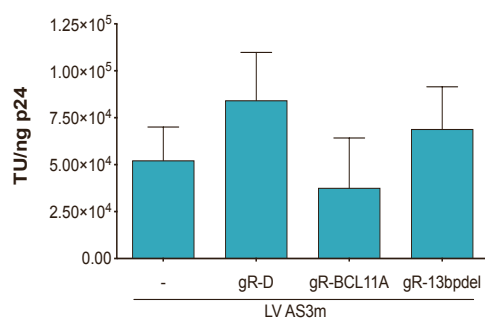**B****RP-HPLC**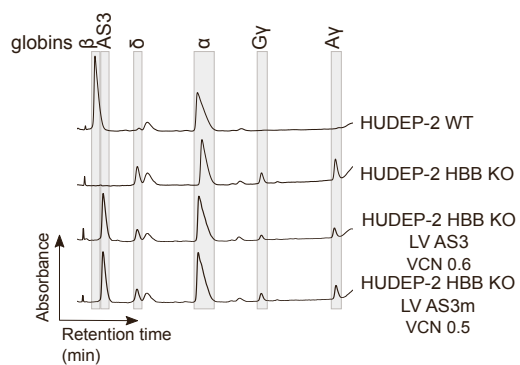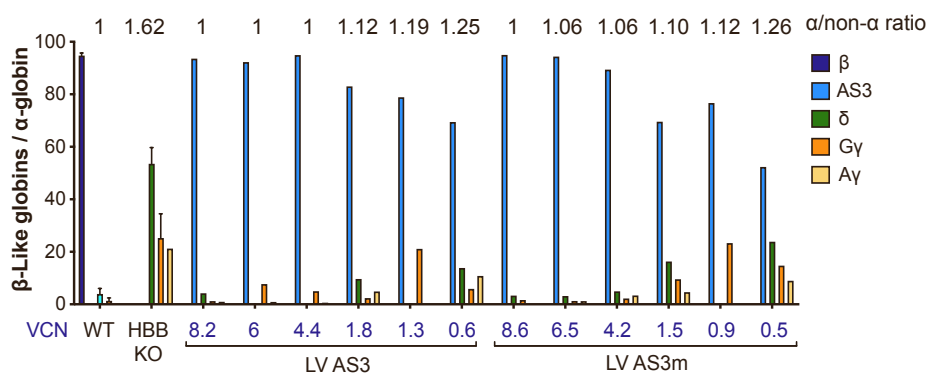**C****CE-HPLC**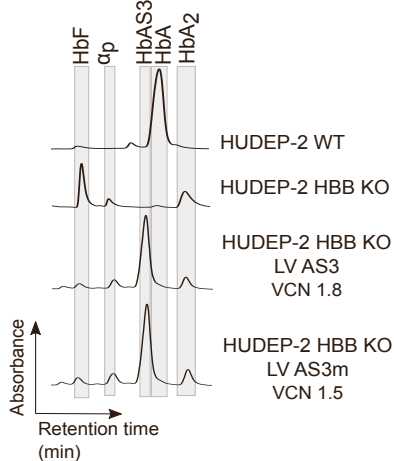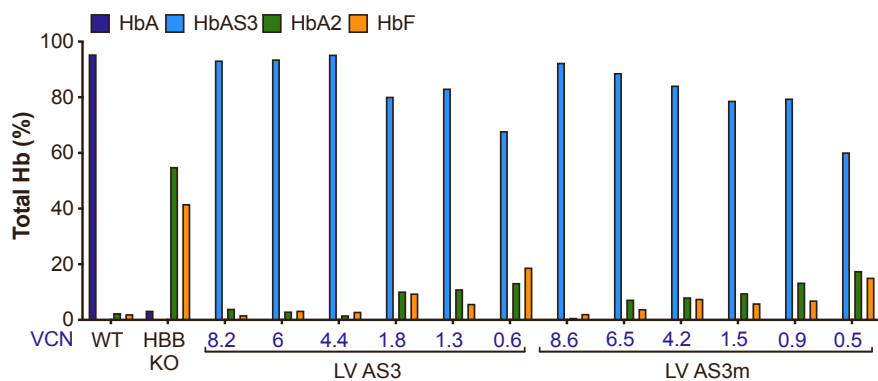

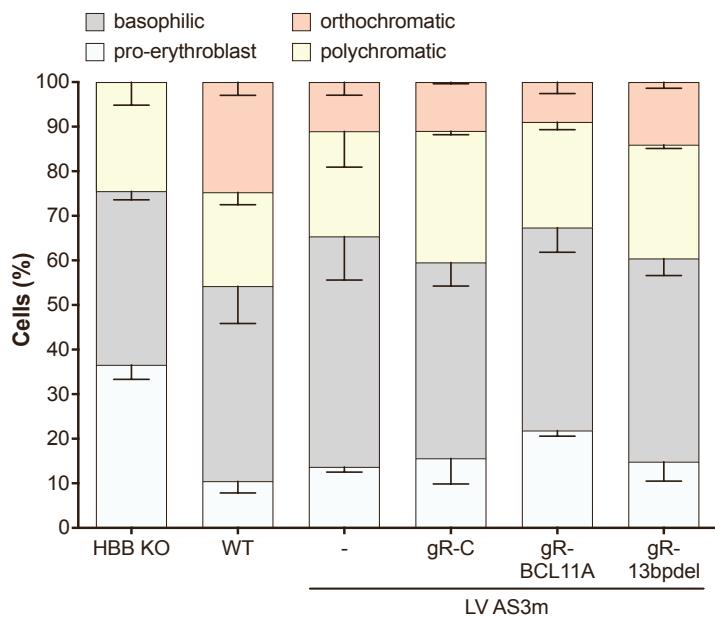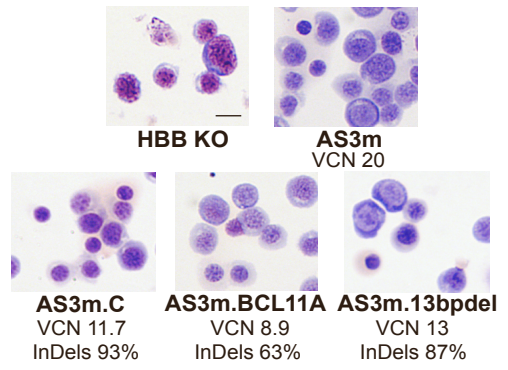

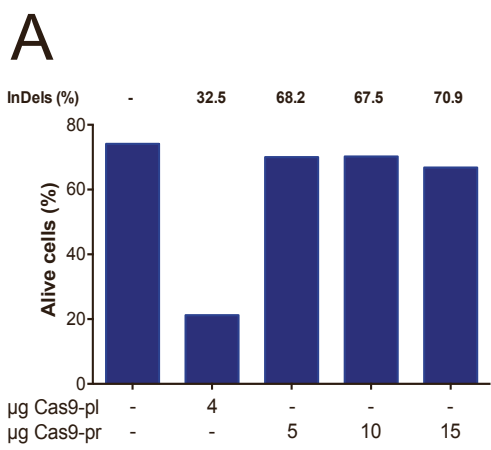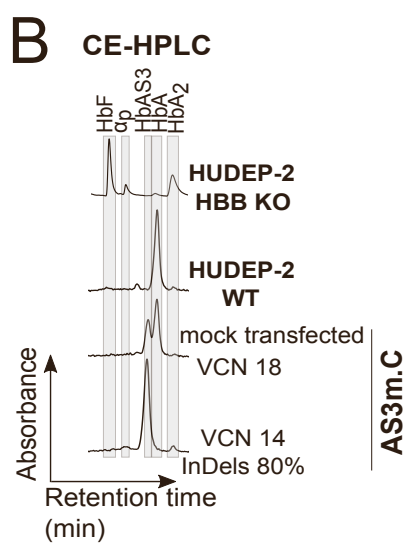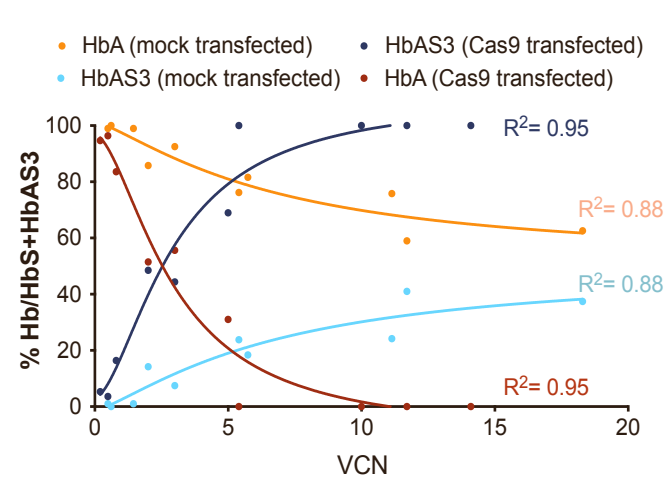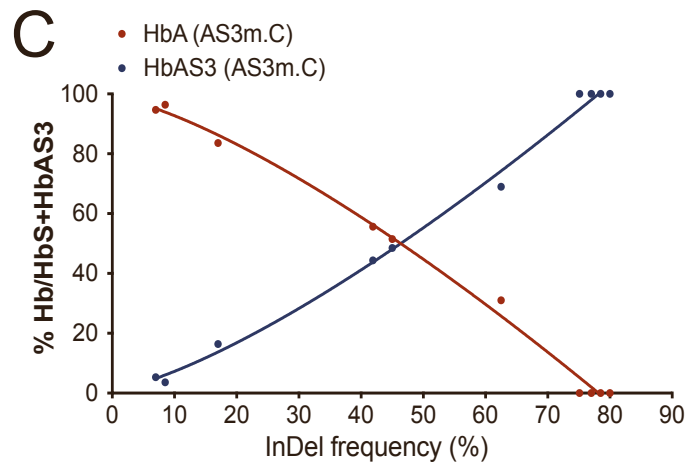

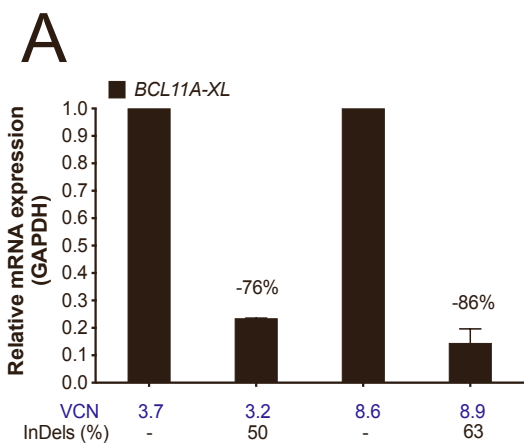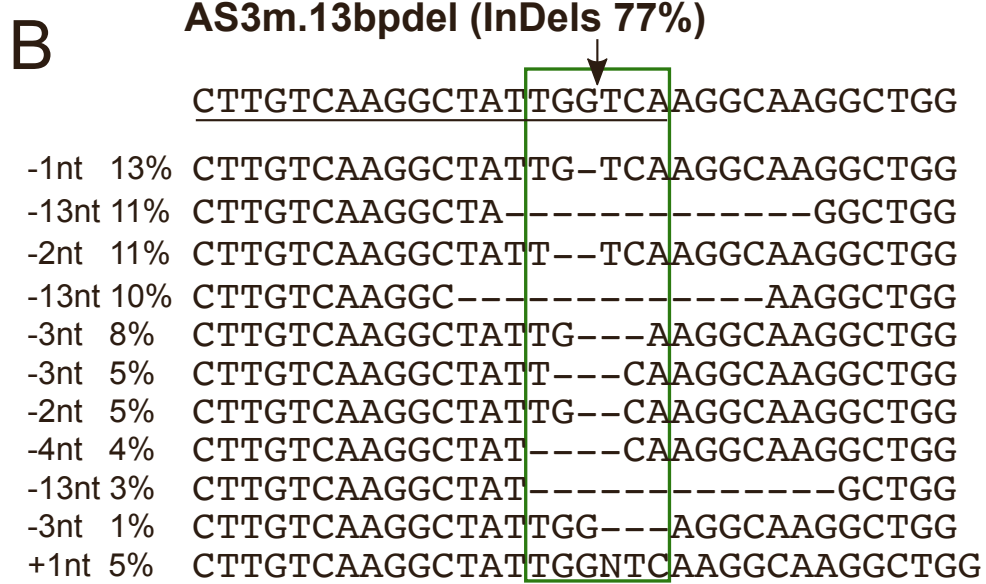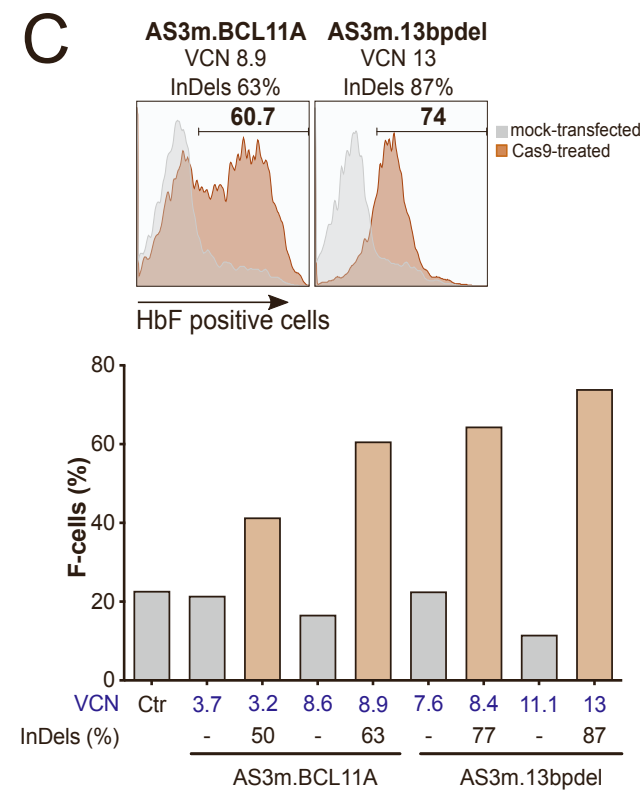

### A LV AS3m.C

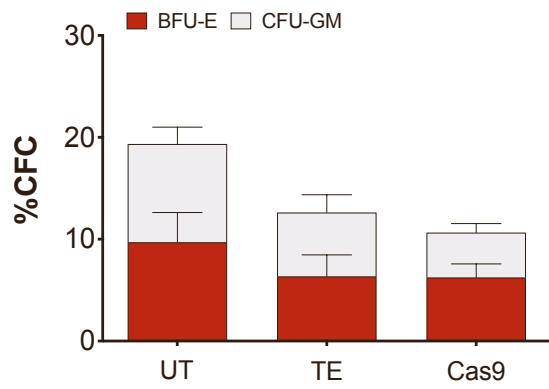

### LV AS3m.13bpdel

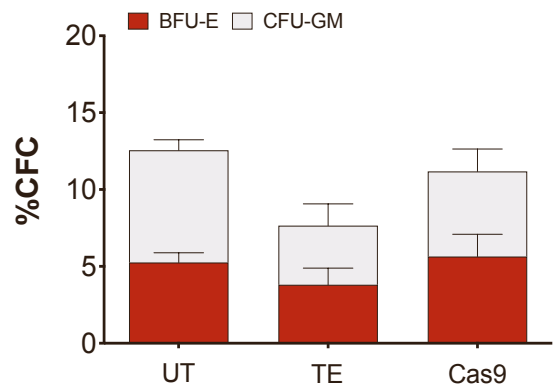

### B

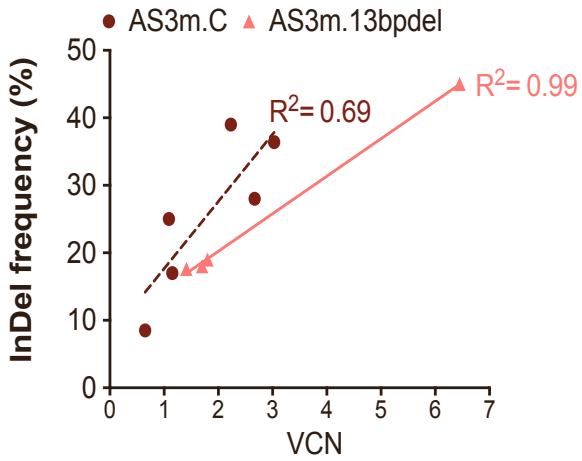

### C

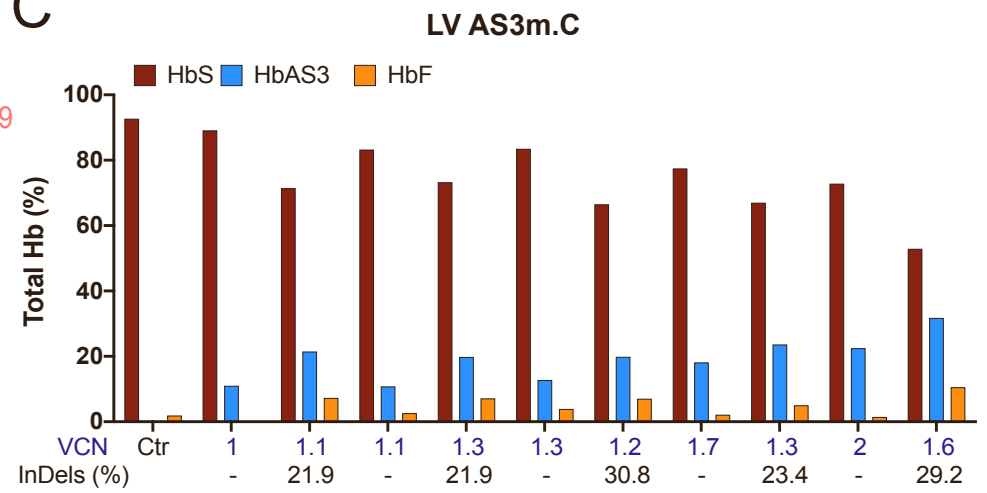

### D

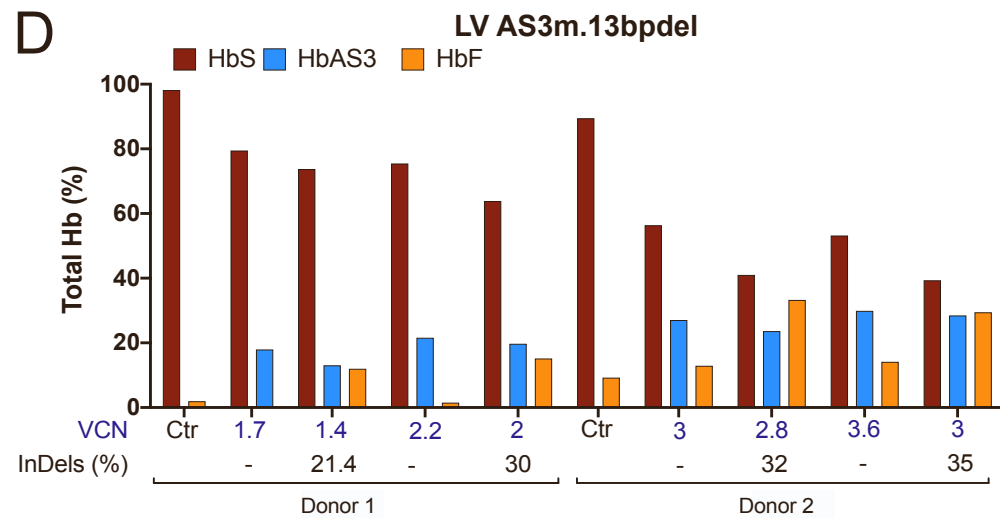

**A**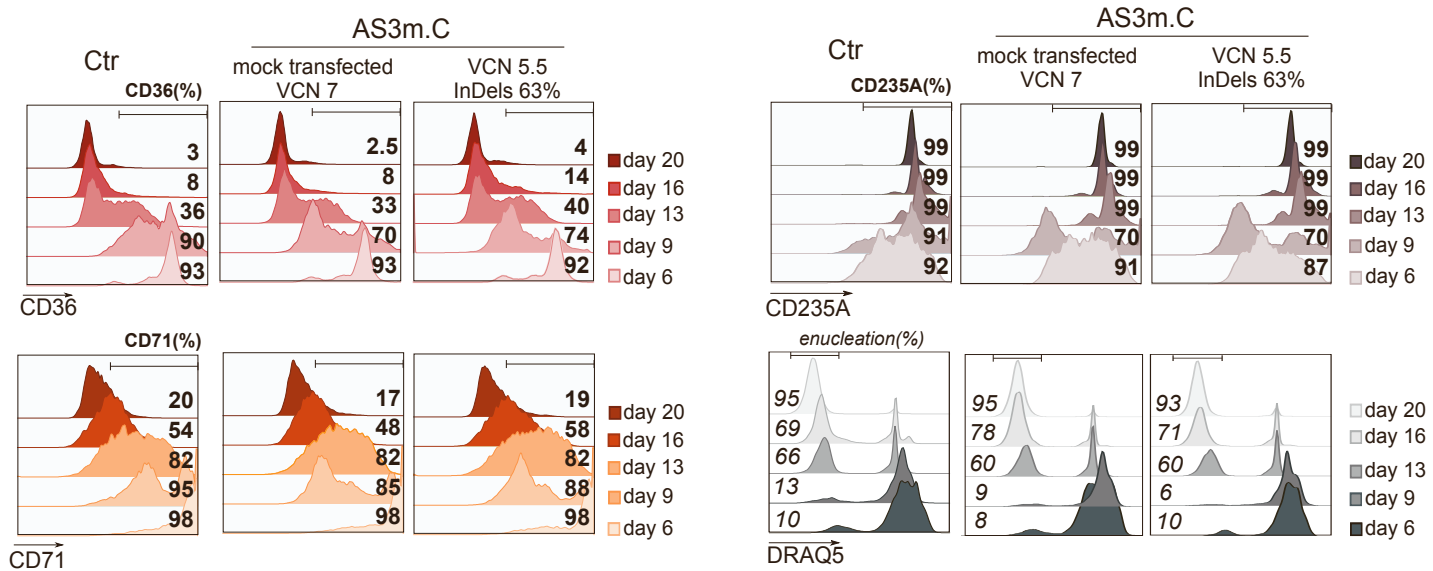**B**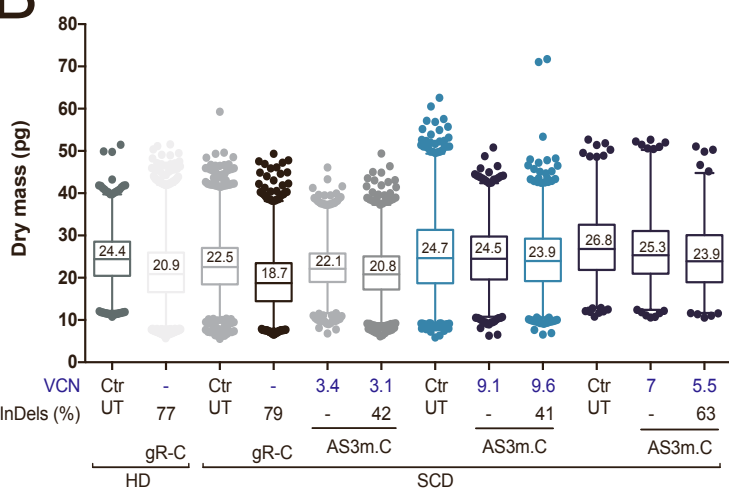**C**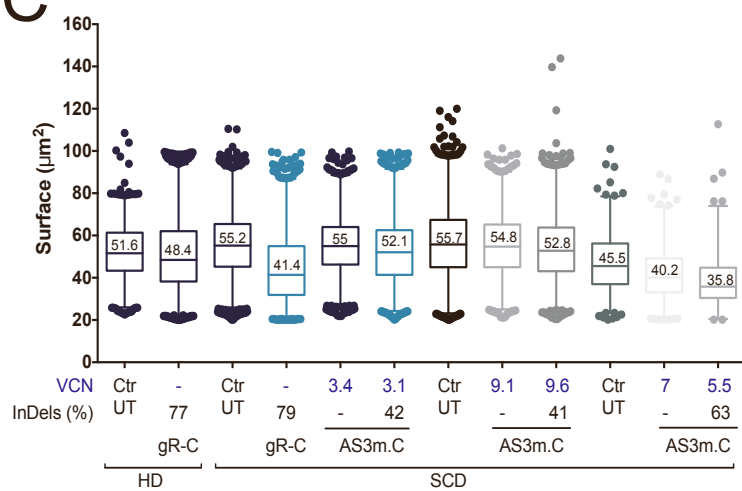**D**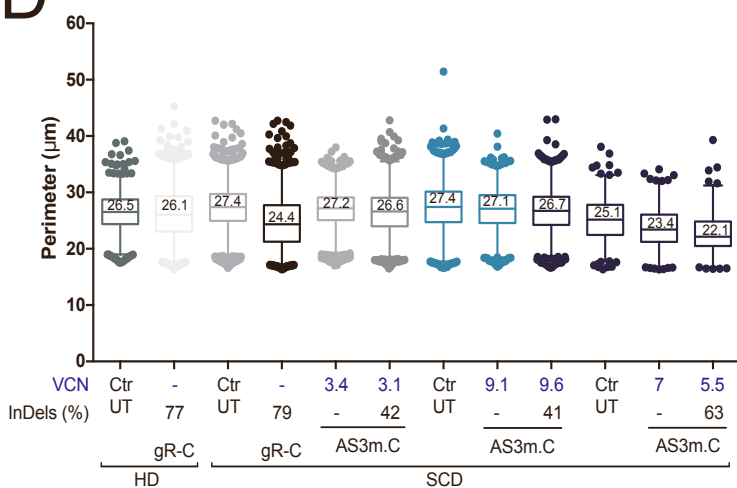**E**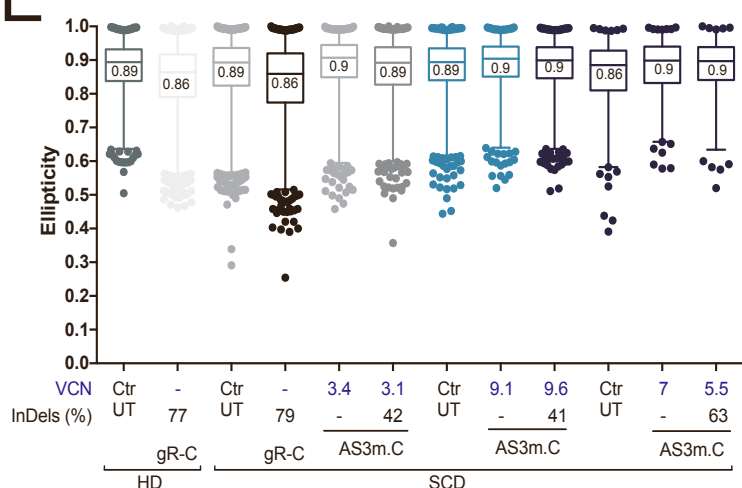



**A**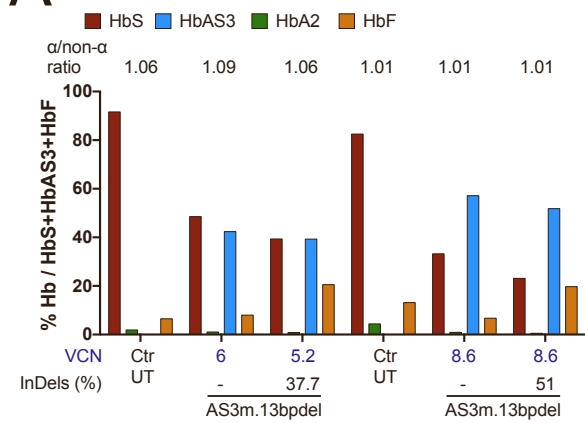**B**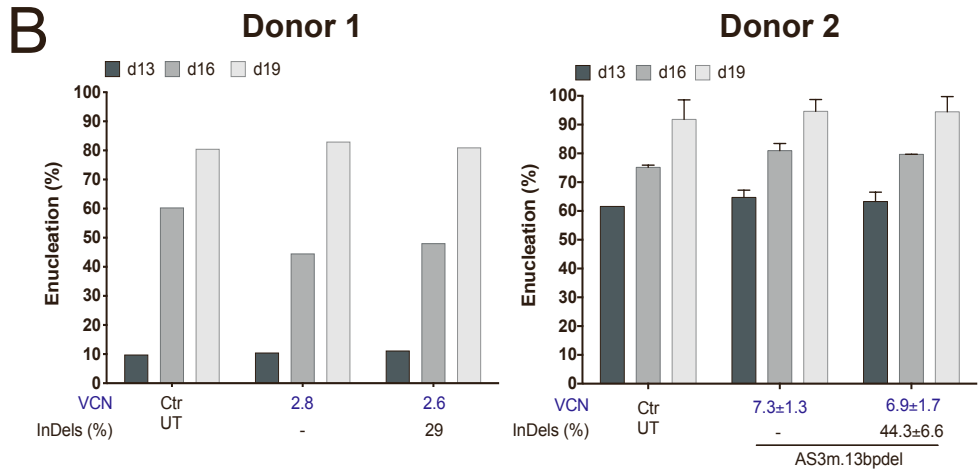**C**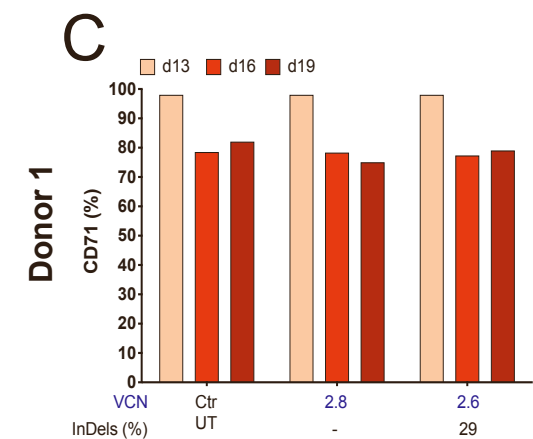**D**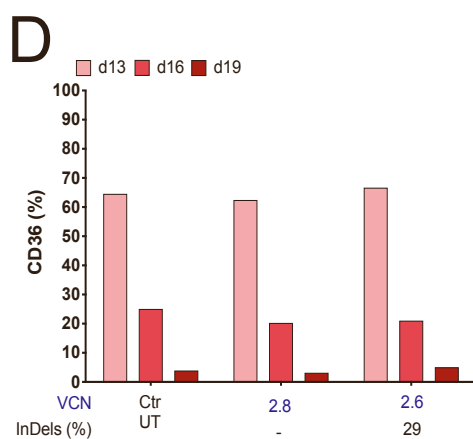**E**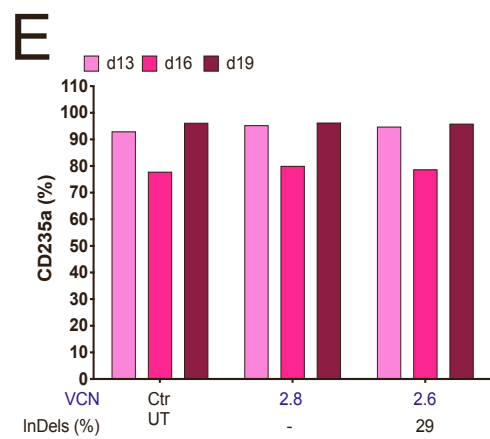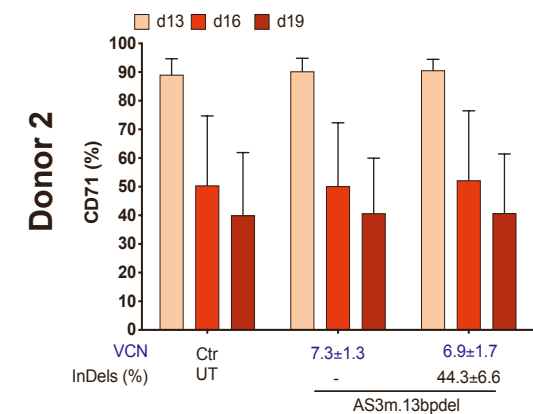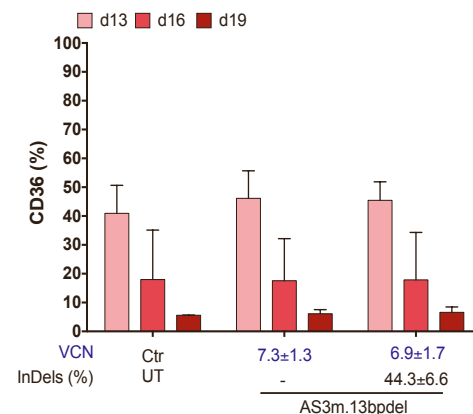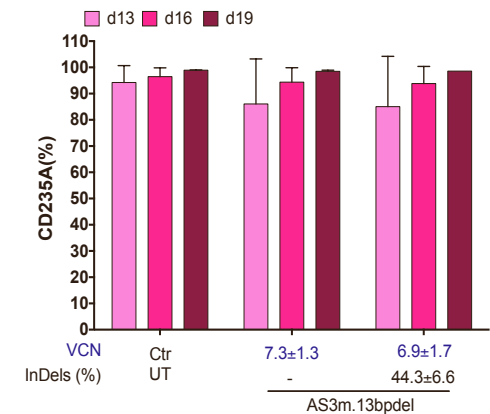**F**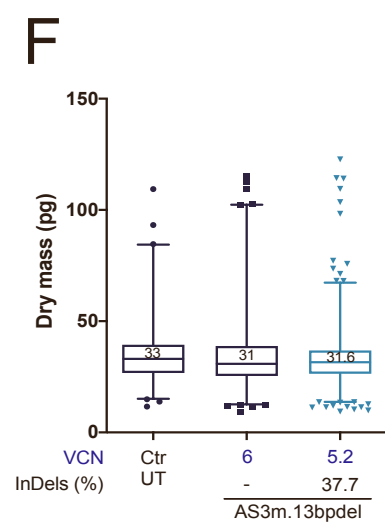**G**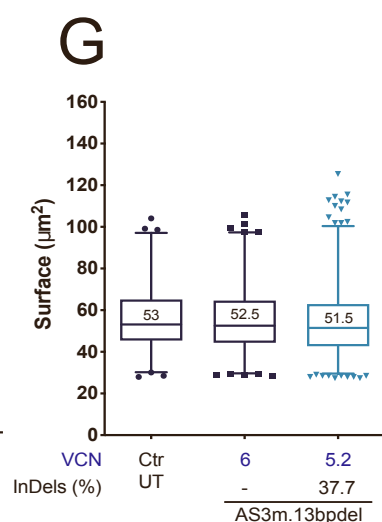**H**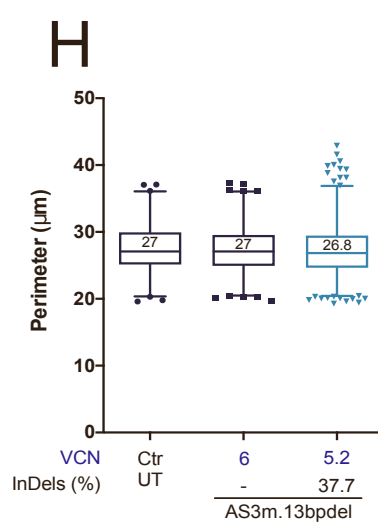**I**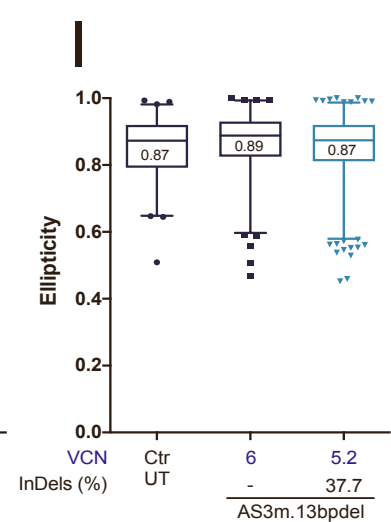

## 1 **Supplementary Figure Legends**

2

### 3 **Supplementary figure 1: Efficiency and safety analysis of sgRNAs knocking down the *HBB*** 4 **gene.**

5 **(A)** RP-HPLC analysis of globin chains in differentiated HUDEP-2 cells transfected with Cas9-GFP  
6 plasmid only (Ctr-Cas9) or with both Cas9-GFP and gR-C plasmids (gR-C). Representative  
7 chromatograms are reported in the left panel. Quantification is reported in the right panel.  $\beta$ -like  
8 globin chains were normalized to the  $\alpha$ -globin chains. The percentage of  $\beta$ -globin decrease is reported  
9 above the histogram bars.  $\alpha$ -non- $\alpha$  ratios are reported on top of each sample (n=3; genome editing  
10 efficiency of  $80.1 \pm 3.0$  (mean $\pm$ SEM)). **(B)** CE-HPLC quantification of Hb tetramers in HUDEP-2  
11 cells transfected with Cas9-GFP plasmid only (Ctr-Cas9) or with both Cas9-GFP and gR-C plasmids  
12 (gR-C). Representative chromatograms are reported in the left panel. Quantification is reported in the  
13 right panel. We calculated the percentage of each Hb type over the total Hb tetramers.  $\alpha P = \alpha$ -  
14 precipitates **(C)** On- and off-target activity evaluated by TIDE in *HBB* and *HBD* in K562 (n=6 for  
15 gR-C and n=5 for gR-D in *HBB*; n=6 for gR-C and gR-D in *HBD*), HUDEP-2 (n=4 for gR-C and gR-  
16 D in *HBB* and *HBD*) and cord blood (CB) HSPCs edited with gR-C (n=3) or D (n=2) . Sequences of  
17 gR-C and D are reported above the graph; mismatches between the sgRNA target sequence and the  
18 potential off-target in *HBD* are indicated in green. PAM is indicated in red. Data are expressed as  
19 mean $\pm$ SEM. **(D)** Editing efficiency of the *HBB* (On-target), *HBD*, *HBG* genes and the top 13 off-  
20 target sites (OT) identified by COSMID in HUDEP-2 (n=4 for *HBB* and *HBD*; n=3 for *HBG*, OT 1,  
21 OT 3, OT 4, OT 6, OT 8, OT 9, OT 11 and OT 12; n= 2 for OT 2, OT 5 , OT 7, OT 10 and OT 13)  
22 and CB HSPCs edited with gR-C (n=5), as measured by TIDE. Data are expressed as mean $\pm$ SEM.  
23 Off-target editing was detected only for OT 4. Its closest genes are Neuregulin 3 (NRG3) (located  
24 300 kb far from off-target 4), which is mainly expressed in CNS tissues, and AL356140.1 miRNA  
25 (located 68 kb far from the off-target site) with unknown functions and potentially involved in  
26 angiogenesis. **(E)** Analysis of the chromatin states at the OT 4 sequence in primary human HSPCs

27 and HSPC-derived erythroid precursors (E-Prec)<sup>1</sup>, and in erythroid (K562) and granulo-monocytic  
28 (GM12878) cell lines (UCSC datasets). OT 4 maps to an inactive region in all the cell types. **(F)**  
29 Representative Sanger sequencing analysis of edited *HBB* alleles in G-CSF mPB HD HSPCs (54%  
30 of total InDels) using ICE Analysis<sup>2</sup>. The top line shows the unmodified *HBB* gene sequence. gR-C-  
31 targeted sequence is underlined. The arrow indicates the cleavage site. Dashes and “N” indicate  
32 deleted and inserted nucleotides, respectively. InDel type, length and frequency are indicated on the  
33 left. **(G)** Editing efficiency and **(H)** out-of-frame mutations evaluated by TIDE analysis after PCR  
34 amplification of the target region and Sanger sequencing in K562 (n=2; unpaired t test \*p<0.05) and  
35 mobilized peripheral blood HD HSPCs edited with gR-C harboring the original (gR-C; n=3) or the  
36 optimized (opt gR-C; n=4) scaffold. Data are expressed as mean±SEM.

37

38 **Supplementary figure 2: Bifunctional LVs expressing an *HBB* modified transgene.**

39 **(A)** Histograms showing: (i) the infectious titer (left panel) of LV AS3m “-“ (n=6) and LV AS3m  
40 containing gR-C (n=6), gR-BCL11A (n=5) and gR-13bpdel (n=5); (ii) infectivity (right panel) of LV  
41 AS3m “-“ (n=4) and LV AS3m containing gR-C (n=6), gR-BCL11A (n=3) and gR-13bpdel (n=3).  
42 Titer and infectivity were evaluated in HCT116 cells. The infectivity was measured as a ratio between  
43 the infectious (TU/ml) and the physical titer (ng p24/ml). Data are expressed as mean±SEM. **(B)** RP-  
44 HPLC chromatograms (left panel) and quantification (right panel) of globin chains in LV AS3- and  
45 LV AS3m-treated cells. WT HUDEP-2 and HBB KO HUDEP-2 served as controls.  $\beta$ -like globin  
46 chains are normalized to  $\alpha$ -globin chains. VCN are reported in blue below the graph.  $\alpha$ /non- $\alpha$  ratios  
47 are reported above the histogram bars. **(C)** CE-HPLC chromatograms (left panel) and quantification  
48 (right panel) of Hb tetramers in LV AS3- and LV AS3m-treated cells. WT HUDEP-2 and HBB KO  
49 HUDEP-2 served as controls. We plotted the percentage of each Hb type over the total Hbs. VCN are  
50 reported in blue below the graph.

51

52 **Supplementary figure 3: LV-treated-HUDEP-2 cells can differentiate into mature**  
53 **erythroblasts.**

54 Quantification (left panel) and representative photomicrographs (right panel) of HUDEP-2 erythroid  
55 precursors obtained at day 9 of the erythroid differentiation and stained with May-Grünwald Giemsa.  
56 HBB KO, WT and mock-transfected HUDEP-2 cells served as controls. HUDEP-2 HBB KO cells  
57 display a higher percentage of immature pro-erythroblasts and absence of more mature  
58 orthochromatic cells compared to WT cells. Data are expressed as mean±SEM. Scale bar, 40 µm  
59 (upper left).

60

61 **Supplementary figure 4: Superior efficiency of Cas9-GFP protein compared to Cas9-GFP**  
62 **plasmid in LV AS3m.C-transduced HUDEP-2 cells.**

63 **(A)** A representative experiment showing the percentage of alive HUDEP-2 cells measured by flow  
64 cytometry 24 hours after transfection with either Cas9-GFP plasmid (4 µg) or Cas9-GFP protein (5-  
65 15 µg). InDel frequency is reported above the histograms. The proportion of alive cells was  
66 significantly lower in plasmid-transfected samples (37±6%) compared to untransfected cells (68±4%;  
67  $p<0.005$ ) or to samples transfected with 15 µg of Cas9-GFP protein (58±4%;  $p<0.05$ ). No  
68 significant differences were observed between untransfected and Cas9-GFP protein-treated samples  
69 ( $n=3-4$ ). **(B)** CE-HPLC chromatograms (left panel) and correlation between VCN and percentage of  
70 HbA or HbAS3 over the total adult tetramers (HbA+HbAS3) (right panel) in LV AS3m.C-transduced  
71 HUDEP-2 cells transfected with 15 µg of Cas9-GFP protein or mock-transfected.  $R^2$  and line-of-best-  
72 fit equation are indicated. **(C)** Correlation between InDel frequency and percentage of HbA or HbAS3  
73 over the total adult tetramers (HbA+HbAS3) in LV AS3m.C-transduced HUDEP-2 cells transfected  
74 with Cas9-GFP protein or mock-transfected.  $R^2$  and line-of-best-fit equation are indicated.

75

76 **Supplementary figure 5: Bifunctional LVs reactivate HbF expression.**

77 (A) Relative expression of *BCL11A-XL* normalized to GAPDH, as measured by qRT-PCR in LV  
78 AS3m.BCL11A-transduced HUDEP-2 cells treated with Cas9-GFP plasmid or mock-transfected  
79 control (“-“). VCN are reported in blue and InDels in black below the graph. Data are expressed as  
80 mean  $\pm$  SEM. (B) Representative Sanger sequencing analysis of edited *HBG* promoters in HUDEP-  
81 2 cells (77% of total InDels) using ICE Analysis<sup>2</sup>. The top line shows the unmodified *HBG1/2*  
82 promoter sequence. sgRNA 13bpdel-targeted sequence is underlined. The arrow indicates the  
83 cleavage site. The BCL11A binding site is highlighted with a green rectangle. Dashes and “N”  
84 indicate deleted and inserted nucleotides, respectively. InDel type, length and frequency are indicated  
85 on the left. (C) Representative flow cytometry plots (upper panel) and quantification (bottom panel)  
86 of HbF-expressing cells in untreated HUDEP-2 cells (Ctr), Cas9-treated and mock-transfected “-“  
87 HUDEP-2 cells transduced either with LV AS3m.BCL11A or LVAS3m.13bpdel. VCN are reported  
88 in blue and InDels in black below the graph.

89

90 **Supplementary figure 6: Correlation between VCN and editing frequency in BFU-E transduced**  
91 **with bifunctional LVs**

92 (A) Frequency of CFC in edited SCD HSPCs (Cas9). LV AS3m.C and LV AS3m.13bpdel-transduced  
93 SCD HSPCs transfected only with TE (TE) or untransfected (UT) were used as control. Data are  
94 expressed as mean $\pm$ SEM (n=4-9; 2 mobilized SCD donors). (B) VCN and InDel frequency were  
95 determined in burst forming unit-erythroid (BFUE) derived from SCD HSPCs transduced either with  
96 LV AS3m.C or LV AS3m.13bpdel and transfected with Cas9-GFP protein. R<sup>2</sup> and line-of-best-fit  
97 equation are indicated. (C) CE-HPLC quantification of Hb tetramers in RBCs derived from untreated  
98 SCD HSPCs (Ctr) and LV AS3m.C-treated SCD HSPCs (1 donor) that were mock-transfected (“-“)  
99 or transfected with Cas9-GFP protein. We plotted the percentage of each Hb type over the total Hb  
100 tetramers. VCN are reported in blue and InDels in black below the graph. (D) CE-HPLC  
101 quantification of Hb tetramers in RBCs obtained from untreated SCD HSPCs (Ctr) and LV  
102 AS3m.13bpdel-treated SCD HSPCs (2 donors) that were mock-transfected (“-“) or transfected with

103 Cas9-GFP protein. We plotted the percentage of each Hb type over the total Hb tetramers. VCN are  
104 reported in blue and InDels in black below the graph.

105

106 **Supplementary figure 7: Erythroid differentiation and RBC parameters in cells derived from**  
107 **LV AS3m.C-edited SCD HSPCs**

108 (A) Representative flow cytometry analysis of the early (CD36 and CD71) and late (CD235A)  
109 erythroid markers at day 6, 9, 13, 16 and 20 of erythroid differentiation of untreated SCD cells (Ctr)  
110 and LV AS3m.C-treated SCD HSPCs that were either mock-transfected or transfected with Cas9-  
111 GFP protein. The enucleation rate was measured using DRAQ5 nuclear staining. (B-E) RBC  
112 parameters extracted using the BIO-Data software. RBCs were obtained after 19 days of  
113 differentiation from SCD HSPCs transduced with LV AS3m.C and either mock- or Cas9-transfected.  
114 As controls, we used untreated SCD RBCs (Ctr UT), and RBCs obtained from SCD/HD HSPCs  
115 transfected with RNPs containing gR-C (gR-C). For each population, data were normalized to the  
116 total number of RBCs and are reported as boxplots showing quartiles, median and outliers. Median  
117 value is indicated inside the boxplot. VCN are reported in blue and InDels in black below the graph.  
118 (B) Dry mass (pg). (C) Surface ( $\mu\text{m}^2$ ). (D) Perimeter ( $\mu\text{m}$ ). (E) Ellipticity.

119

120 **Supplementary figure 8: Erythroid markers and RBC parameters were not impaired in cells**  
121 **derived from LV AS3m.13bpdel-edited SCD HSPCs.**

122 (A) CE-HPLC quantification of Hb tetramers in untreated SCD cells (Ctr UT), and LV  
123 AS3m.13bpdel-treated SCD HSPCs that were either mock-transfected “-“ or transfected with Cas9-  
124 GFP protein. We plotted the percentage of each Hb type over the total Hbs. VCN are reported in blue  
125 and InDels in black below the graph. The  $\alpha$ -/non- $\alpha$ -globin ratios evaluated by RP-HPLC are reported  
126 on top of the histograms. (B-E) Flow cytometry analysis of the enucleation rate and of the early  
127 (CD71 and CD36) and late (CD235A) erythroid markers at day 13, 16 and 19 of erythroid  
128 differentiation of untreated SCD HSPCs (Ctr UT) and LV AS3m.13bpdel-treated SCD HSPCs that

129 were either mock-transfected or transfected with Cas9-GFP protein (n=3 biological replicates. 2  
 130 donors). VCN and InDels values are reported below the graph as mean±SEM. **(B)** Enucleation rate  
 131 measured using DRAQ5 nuclear staining. **(C-E)** Proportion of CD71<sup>+</sup>, CD36<sup>+</sup> and CD235A<sup>+</sup> cells  
 132 during erythroid differentiation. **(F-I)** RBC parameters extracted using the BIO-Data software. RBCs  
 133 were obtained after 19 days of differentiation from SCD HSPCs transduced with LV AS3m.13bpdel  
 134 and either mock- or Cas9-transfected. As control, we used untreated SCD RBCs (Ctr UT). For each  
 135 population, data were normalized to the total number of RBCs belonging and are reported as boxplots  
 136 showing quartiles, median and outliers. Median value is indicated inside the boxplot. VCN are  
 137 reported in blue and InDels in black below the graph. **(F)** Dry mass (pg). **(G)** Surface (μm<sup>2</sup>). **(H)**  
 138 Perimeter (μm). **(I)** Ellipticity.

139

## 140 **Supplementary Methods**

141

### 142 **Plasmid construction**

143 Plasmids expressing a Cas9-GFP fusion protein (pMJ920) and sgRNA (MLM3636) were purchased  
 144 from Addgene (plasmids #42234 and #43860). The MA128 plasmid, containing the optimized  
 145 sgRNA scaffold<sup>3</sup>, was kindly provided by Dr. Amendola. The list of the sgRNA target sequences is  
 146 provided in **Supplementary table 1**.

147

| sgRNA name | Target sequence + PAM (5' to 3')   | Strand | Hg19 genomic location     |
|------------|------------------------------------|--------|---------------------------|
| gR-A       | gCCTTGCCCCACAGGGCAGTAAC <b>CGG</b> | -      | chr11:5,226,968-5,226,987 |
| gR-B       | GTAACGGCAGACTTCTCCTC <b>AGG</b>    | -      | chr11:5,226,980-5,227,009 |

|      |                                  |   |                               |
|------|----------------------------------|---|-------------------------------|
| gR-C | gTCTGCCGTTACTGCCCTGT <b>GGG</b>  | + | chr11:5,226,973-<br>5,226,994 |
| gR-D | gAAGGTGAACGTGGATGAAGT <b>TGG</b> | + | chr11:5,226,948-<br>5,226,970 |

148

149 **Supplementary Table 1: List of the sgRNAs targeting *HBB* exon 1.** When the first nucleotide of the target sequence  
150 was different from a guanosine, we inserted a guanosine (indicated in lowercase) to allow U6-driven sgRNA  
151 expression. PAM sequences are highlighted in bold. For each sgRNA, we reported the hg19 genomic coordinates.  
152 gR-A sequence was retrieved from <sup>4</sup>, gR-B sequence from <sup>5</sup>, and gR-C and gR-D sequenced from <sup>6</sup>.

153

#### 154 **HUDEP-2 and K562 cultures and differentiation**

155 K562 were maintained in RPMI 1640 medium (Lonza) containing 2 mM glutamine and supplemented  
156 with 10% fetal bovine serum (FBS, BioWhittaker, Lonza), HEPES (20 mM, LifeTechnologies),  
157 sodium pyruvate (1 mM, LifeTechnologies) and penicillin/streptomycin (100U/ml each,  
158 LifeTechnologies).

159 HUDEP-2 cells<sup>7</sup> were cultured and differentiated for 8-9 days as previously described<sup>8</sup>. A  
160 standard May-Grumwald Giemsa staining was performed to evaluate the cell morphology during  
161 HUDEP-2 differentiation. Two fields per condition and a total of around 280 cells were counted.  
162 Erythroid differentiation was monitored during the culture by flow cytometry analysis.

163 HUDEP-2 thalassemic cells (*HBB* KO) were generated by transfecting HUDEP-2 WT cells  
164 with plasmids harboring the gR-D targeting *HBB* exon 1 and the Cas9-GFP. FACS-sorted GFP<sup>+</sup> cells  
165 were cloned by limiting dilution. After 14 days, single clones were isolated, expanded and screened  
166 by PCR and Sanger sequencing of the target sequence, followed by TIDE analysis. We selected a  
167 HUDEP-2 clone harboring bi-allelic frameshift mutations in the exon 1 of *HBB* gene and  
168 characterized by the absence of  $\beta$ -globin chain expression.

169

#### 170 **Lentiviral transduction of erythroid HUDEP-2 cell lines**



171 Cells were transduced ( $1 \times 10^6$  cells/ml) for 24 h in the proliferation medium<sup>8</sup> supplemented with  
172 protamine sulfate (4  $\mu$ g/ml, Sigma-Aldrich or APP Pharmaceuticals).

173

#### 174 **Plasmid transfection of erythroid cell lines and HSPCs**

175 One million cells were transfected with 4  $\mu$ g of the Cas9-GFP plasmid (pMJ920) and 0.8-1.6  $\mu$ g of  
176 each sgRNA plasmid (MLM3636 or MA128) in a 100  $\mu$ l volume using Nucleofector I (Lonza). We  
177 used AMAXA Cell Line Nucleofector Kit V (VCA-1003) for K562 and HUDEP-2 (T-16/U-16 and  
178 L-29 programs, respectively), and AMAXA Human CD34 Cell Nucleofector Kit (VPA-1003; U-08  
179 program) for HD HSPCs. GFP<sup>+</sup> HUDEP-2 cells and GFP<sup>+</sup> HSPCs were FACS-sorted using SH800  
180 Cell Sorter (Sony Biotechnology). As control, we used untreated cells, cell transfected only with  
181 Cas9-GFP plasmid or cells transfected only with nuclease-free TE buffer (10mM Tris and 1mM  
182 EDTA, pH 8).

183

#### 184 **CFC Assay**

185 In the Colony Forming Cell (CFC) assay, SCD HSPCs were plated at a concentration of  $2 \times 10^3$   
186 cells/ml in a methylcellulose-based medium (GFH4435, Stem Cell Technologies, Vancouver, BC,  
187 USA). BFU-E and CFU-GM colonies were counted 14 days after plating. BFU-E colonies were  
188 randomly picked and collected as bulk populations (containing at least 25 colonies) to evaluate the  
189 LV transduction and editing efficiencies.

190

#### 191 **Vector copy number analysis**

192 HUDEP-2 cells and HSPC-derived mature erythroblasts were collected at day 9 and 13 of erythroid  
193 differentiation, respectively. BFU-E pools were collected 14 days after HSPC plating in the  
194 methylcellulose medium. Genomic DNA (gDNA) was extracted using PURE LINK Genomic DNA  
195 Mini kit (Life Technologies) following manufacturer's instructions. VCN per diploid genome was  
196 determined by digital droplet polymerase chain reaction (ddPCR), using the droplet reader QX200

197 droplet reader (Biorad), as previously described<sup>9</sup>. Fifty ng of gDNA was digested with 20 unit of DraI  
198 enzyme (New England BioLabs) in a total volume of 6 µL for 30 min at 37°C. We used 6 µL of the  
199 restriction mixture for the subsequent ddPCR analysis. We used primers and probes specific for: (i)  
200 the viral Ψ (PSI) packaging signal (HIV1-PSI FOR 5'-TCCCCCGCTTAATACTGACG-3', HIV1-  
201 PSI REV 5'-CAGGACTCGGCTTGCTGAAG-3', HIV1-PSI PROBE FAM 5'-  
202 CGCACGGCAAGAGGCGAGG-3'); (ii) the human albumin gene (*ALB*), as an internal reference  
203 standard (ALB FOR 5'-GCTGTCATCTCTTGTGGGCTGT-3', ALB REV 5'-  
204 ACTCATGGGAGCTGCTGGTTC-3', ALB PROBE VIC 5'-  
205 CCTGTCATGCCACACAAATCTCTCC-3'). The VCN was determined with the QuantaSoft  
206 software by calculating the ratio between the target molecule concentration and the reference  
207 molecule concentration multiplied by the number of copies of reference species in the genome.

208

### 209 **PCR-based assays for detection of genome editing events**

210 Genomic DNA was extracted using PURE LINK Genomic DNA Mini kit (Life Technologies)  
211 following manufacturer's instructions. To evaluate editing efficiency at sgRNA on-target and off-  
212 target sites (predicted using COSMID; OT 1 to OT 13, **Supplementary Table 2**), we performed PCR  
213 followed by Sanger sequencing and TIDE (Tracking of InDels by Decomposition)<sup>10,11</sup> or Synthego  
214 Performance ICE Analysis<sup>2</sup>. Primer sequences used for PCR analysis are listed in **Supplementary**  
215 **Table 3**.

216

| Name  | Target sequence                                | Mismatches | Hg19 genomic location       | Strand | COSMID score | Type       | Gene    |
|-------|------------------------------------------------|------------|-----------------------------|--------|--------------|------------|---------|
| HBB   | TCTGCCGTTACTGCCCTGT                            | -          | chr11:5,226,973-5,226,994   | -      | N/A          | exon 1     | HBB     |
| HBD   | <u>A</u> CTGC <u>I</u> GT <u>C</u> AAATGCCCTGT | 4          | chr11:5,234,385-5,234,407   | -      | N/A          | exon 1     | HBD     |
| HBG   | <u>G</u> GCTACTAT <u>C</u> ACA <u>A</u> GCCTGT | 8          | chr11:5,249,756-5,249,778   | +      | N/A          | exon 1     | HBG1/2  |
| OT 1  | TCTGCC <u>A</u> ITCTGCCCTGT                    | 2          | Chr8:38,506,485-38,506,505  | -      | 1.48         | intergenic |         |
| OT 2  | TCTGC <u>I</u> GTTA <u>I</u> GCCCTGT           | 2          | Chr5:121558627-121558647    | +      | 2.24         | intergenic |         |
| OT 3  | TCTGCC <u>C</u> TTACTG <u>I</u> CCTGT          | 2          | Chr19:1379110-1379131       | +      | 2.17         | intergenic |         |
| OT 4  | <u>G</u> ITGCCGTTACTGCCCT <u>C</u> T           | 3          | Chr10:83,375,539-83,375,561 | +      | 5.28         | intergenic |         |
| OT 5  | TCTGCCGTT <u>I</u> ACTGCCCTGT                  | 1          | Chr1:162859324-162859346    | +      | 21.05        | intergenic |         |
| OT 6  | TCTGCCGTT <u>C</u> TGCCCTGT                    | 1          | Chr8:10621755-10621775      | -      | 21.21        | intron 5   | SOX7    |
| OT 7  | <u>T</u> CAGCAGATACTGCCCTGT                    | 3          | Chr1:160398097-160398118    | -      | 0.75         | exon 8     | VANGL2  |
| OT 8  | <u>C</u> CTGCC <u>I</u> GTTACTGCCCTGT          | 2          | Chr11:28827844-28827866     | +      | 1.1          | intergenic |         |
| OT 9  | TCTGCC <u>I</u> TTT <u>T</u> GCCCTGT           | 2          | Chr7:101091535-101091555    | +      | 1.48         | intron 3   | COL26A1 |
| OT 10 | TCTGCC <u>C</u> TT <u>C</u> TGCCCT <u>G</u> C  | 3          | Chr12:48176342-48176363     | -      | 6.97         | exon 3     | SLC48A1 |
| OT 11 | <u>T</u> CAGCCATTACTGCCCTGT                    | 2          | Chr7:127238493-127238514    | -      | 20.44        | exon 4     | FSCN3   |
| OT 12 | TCTGCCGTTACT <u>I</u> CCCT <u>G</u> C          | 2          | Chr14:89076092-89076113     | +      | 27.3         | exon 15    | ZC3H14  |
| OT 13 | TCTGCCGATA <u>T</u> GCCCTGT                    | 2          | Chr17:17636353-17636374     | -      | 1.15         | intron 2   | RAI1    |

217

218 **Supplementary Table 2: List of the potential off-target loci for gR-C.** Putative off-target sequences for gR-C in  
219 *HBD* and *HBG* genes and top-13 off-target loci predicted by COSMID<sup>12</sup>. Mismatches between the on-target *HBB*  
220 sequence and off-targets are underlined.

221

| Name  | Orientation | Primer sequence (5' to 3') |
|-------|-------------|----------------------------|
| HBB   | Fwd         | CAGTGCAGCTCACTCAGGTGT      |
|       | Rev         | ACTCCTAAGCCAGTGCCAGA       |
| HBAS3 | Fwd         | CAGTGCAGCTCACTCAGCTG       |
|       | Rev         | ACTCCTAAGCCAGTGCCAGA       |
| HBD   | Fwd         | TGAGCCAGGCCATCACTAAAGG     |
|       | Rev         | CAGGGTTTCTGAGTCAAGACACAC   |
| HBG   | Fwd         | CCTCTGGGTCCATGGGTAGA       |
|       | Rev         | GCAGTATCCTCTTGGGGGCC       |
| OT 1  | Fwd         | CAAGCCGTAGATGGAATCTCTTGG   |
|       | Rev         | CCCAGGGAGAAAGGGAGAAAG      |

|        |     |                          |
|--------|-----|--------------------------|
| OT 2   | Fwd | CAGTTTGAGCTGCTGAGGCAC    |
|        | Rev | GAGAACTGCTTTTGCTGCATCACG |
| OT 3   | Fwd | TGGCCACACAGTGAGACTCC     |
|        | Rev | AAGCGTGCAGGCTTCTGAGG     |
| OT 4   | Fwd | TGCAAGATAGGGACAGAAGAAGCC |
|        | Rev | GCCAGGAACATGGTAGACATTACG |
| OT 5   | Fwd | TCCCCTCCCTGGTTTCACCAT    |
|        | Rev | ATCTGGCTAAGACATCCTGGCTC  |
| OT 6   | Fwd | GTCACCGAATTGGGGGCAAG     |
|        | Rev | AGGAGGTCCTCAGAAGGCTTAAG  |
| OT 7   | Fwd | CCCTCCCATTTCAGCCCTTAAC   |
|        | Rev | CAACAGAATGCCCCACAAAAGTC  |
| OT 8   | Fwd | TCTTCCTGGCCAGAACTGTTCC   |
|        | Rev | CAGAATAGAGGTCGGGGATTGAG  |
| OT 9   | Fwd | CACCGAGGCAGGTCCTAGTT     |
|        | Rev | AGGAGTTCGAGGCTGCAGTG     |
| OT 10  | Fwd | AGCGTGTGTGTGAGTGAGGC     |
|        | Rev | GGGAAGGAGCCATCAACAGTG    |
| OT 11  | Fwd | TCTCTCCCTATGATATCCTGGCG  |
|        | Rev | TGGGGTTTCACGTGGTCAGG     |
| OT 12  | Fwd | TGAACAGTTTCAGACCACTTGGCC |
|        | Rev | CTCCAAAACCAGGTGAGTGAGTG  |
| OT 13  | Fwd | GTCCTGCTGCCAGCTTGTT      |
|        | Rev | CTCCTTATCTTTCCCCACGCAG   |
| BCL11A | Fwd | TGGACAGCCCGACAGATGAA     |

|         |     |                                |
|---------|-----|--------------------------------|
|         | Rev | AAAAGCGATACAGGGCTGGC           |
| 13bpdel | Fwd | AAAAACGGCTGACAAAAGAAGTCCTGGTAT |
|         | Rev | ATAACCTCAGACGTTCCAGAAGCGAGTGTG |

222 **Supplementary Table 3: List of primers for on-target and off-target analyses.** Primers used to amplify the on-  
223 target loci of gR-A, gR-B, gR-C, gR-D, gR-BCL11A and gR-13bpdel, and the top-predicted off-target loci of gR-  
224 C. HBD primers were also used to evaluate the potential off-target activity of gR-D at the *HBD* gene. Fwd: forward  
225 and Rev: reverse.

226

### 227 **GUIDE-seq and deep-sequencing analysis of off-target loci**

228 GUIDE-seq was performed in HEK293 cells as previously described<sup>13,14</sup>. Off-targets identified by  
229 GUIDE-seq were PCR-amplified using the Phusion High-Fidelity Taq polymerase with GC Buffer  
230 (New England BioLabs). Primer sequences used to amplify off-targets identified by GUIDE-seq are  
231 listed in **Supplementary Table 4**. We performed PCR followed by deep sequencing analyses as  
232 previously described<sup>15</sup>. Briefly, Illumina compatible barcoded DNA amplicon libraries were prepared  
233 using the TruSeq DNA PCR-Free kit (Illumina). Libraries were pooled and sequenced using Illumina  
234 HiSeq2500 (paired-end sequencing 130 130 bases). A total of 0.59 to 1.12 million passing filter reads  
235 per sample were produced. Targeted deep-sequencing data were analyzed using CRISPRESSO<sup>16</sup>.  
236 The GUIDE-seq datasets are available in the BioProject repository under the accession number  
237 PRJNA734605.

238

| Name   | Orientation | Primer sequence (5' to 3') |
|--------|-------------|----------------------------|
| chr 9  | Fwd         | CTCCCAAATTGAAAGCACAGCCAG   |
|        | Rev         | TTTCCCGTTCTCCACCCAATAGC    |
| chr 10 | Fwd         | TGGAGAAAGACAATGGCAGTGAGG   |
|        | Rev         | CTAGCACTGCCCCACAATAGTAC    |

|        |     |                          |
|--------|-----|--------------------------|
| chr 6  | Fwd | CCAGCATCACTACCAAGTCTCC   |
|        | Rev | AAAATCCCCCCACGGATGCC     |
| chr 3  | Fwd | CCCTAAGATTGTGGTTCCTTAGCC |
|        | Rev | CAGGATTACTTGGGCAGAGACTAC |
| chr 17 | Fwd | GGAATGACTGAATCGGAACAAGG  |
|        | Rev | CTGGCCTCACTGGATACTCT     |

239 **Supplementary Table 4. Primers used to amplify putative off-targets of gR-C (chr 9, 10, 6 and 3) or gR-**  
240 **13bpdel (chr 17).** Fwd: forward and Rev: reverse.

241

#### 242 **Quantitative RT-PCR (qRT-PCR)**

243 Total RNA was extracted using RNeasy micro kit (QIAGEN) following manufacturer's instructions.

244 Mature transcripts were reverse-transcribed using SuperScript First-Strand Synthesis System for RT-

245 PCR (Invitrogen) with oligo(dT) primer. qRT-PCR was performed using an iTaq Universal SYBR

246 green master mix (Bio-Rad) and Viia7 Real-Time PCR system (Thermo Fisher Scientific). Primer

247 sequences are listed in **Supplementary Table 5.**

248

249

| Gene   | Orientation | Sequence (5' to 3')    |
|--------|-------------|------------------------|
| HBA    | Fwd         | CGGTCAACTTCAAGCTCCTAA  |
|        | Rev         | ACAGAAGCCAGGAACTTGTC   |
| HBB    | Fwd         | AAGGGCACCTTTGCCACA     |
|        | Rev         | GCCACCACTTTCTGATAGGCAG |
| HBAS3  | Fwd         | AAGGGCACCTTTGCCAG      |
|        | Rev         | GCCACCACTTTCTGATAGGCAG |
| HBG1/2 | Fwd         | CCTGTCCTCTGCCTCTGCC    |

|               |     |                       |
|---------------|-----|-----------------------|
|               | Rev | GGATTGCCAAAACGGTCAC   |
| GAPDH         | Fwd | GAAGGTGAAGGTCGGAGT    |
|               | Rev | GAAGATGGTGATGGGATTTTC |
| BCL11A-<br>XL | Fwd | ATGCGAGCTGTGCAACTATG  |
|               | Rev | GTAAACGTCCTTCCCCACCT  |

250 **Supplementary Table 5. List of primers used for qRT-PCR.**

251

252 **Flow cytometry analysis**

253 We labeled HUDEP-2 cells and HSPC-derived erythroblasts with antibodies against CD36 (CD36-  
254 V450, BD Horizon), CD71 (CD71-FITC, BD Pharmingen), CD235a (CD235a-APC, BD  
255 Pharmingen; CD235a-PECY7, BD Pharmingen), CD49d (CD49d-APC, BD Bioscience) and Band3  
256 (Band3-PE, Bristol Institute for Transfusion Sciences) surface markers. We used the nuclear dye  
257 DRAQ5 (eBioscience, 0.1/100 dilution) to evaluate the proportion of enucleated RBCs.

258 Differentiated cells were fixed and permeabilized using BD Cytotfix/Cytoperm solution (BD  
259 Pharmingen) for HUDEP-2 cells and glutaraldehyde and Triton 1X for HSPCs-derived erythroblasts.  
260 After permeabilization, cells were stained with antibodies recognizing HbF (HbF-APC, MHF05, Life  
261 Technologies and HbF-FITC, 552829, BD Pharmingen, 1/100 dilution).

262 We performed flow cytometry analyses using Fortessa X20 flow cytometer (BD  
263 Biosciences) and Gallios (Beckman Coulter).

264

265 **Western blot**

266 Differentiated HUDEP-2 cells (9 days of differentiation;  $2-3 \times 10^6$  cells) were collected and  
267 resuspended for 30 min at 4°C in a lysis buffer containing: 10mM Tris, 1 mM EDTA, 0.5mM EGTA,  
268 1% Triton X-100, 0.1% SDS, 0.1% Na-deoxycholate, 140mM NaCl (Sigma-Aldrich) and protease  
269 inhibitor cocktail (Roche-Diagnostics). Cell lysates were sonicated twice (50% amplitude, 10 sec per  
270 cycle, pulse 9 sec on/1 sec off) and underwent 3 cycles of freezing/thawing (3 min at -80°C/3 min at

271 37°C). Lysates were centrifuged at 12.000 x g for 10 min at 4°C, and supernatants were used as  
272 protein extracts for biochemical analysis. Protein concentration was measured using the Pierce™  
273 BCA Protein Assay Kit (ThermoScientific). 25 µg of samples were loaded on a 15% (wt/vol) Sodium  
274 Dodecyl Sulphate (SDS)-PAGE gel and transferred onto PVDF membranes (Millipore) pre-activated  
275 in ethanol, using a Mini Blot Transfer Module (Thermo). After transfer, membranes were incubated  
276 for 1 hour in Tris-buffered saline (TBS)-Tween buffer (50 mM Tris-HCl pH8, 150 mM NaCl, 0.1%  
277 Tween 20 in water) completed with 5% skim milk. Immunoblots were carried out over-night at 4°C  
278 in a solution containing 3% (wt/vol) BSA in TBS with a mouse antibody recognizing β-globin (1:200;  
279 sc-21757, SantaCruz) or a goat antibody against α-globin (1:200; sc-31110, SantaCruz). Blots were  
280 washed and incubated with peroxidase-conjugated donkey anti-mouse (1:10,000) or donkey anti-goat  
281 (1:5,000) antibody for 60 min at RT. After washing, blots were incubated with enhanced  
282 chemiluminescent (ECL) substrate (Pierce) and exposed to film (Amersham) that was developed  
283 following manufacturer's instructions. Images were quantified by using Gel-Pro analyzer 4.0 (Media  
284 Cybernetics).

285

286

287

## 288 **Keywords**

289

290 Lentiviral vectors, genome editing, CRISPR/Cas9 nuclease, sickle cell disease.

291

## 292 **References**

293

294 1. Romano O, Petiti L, Felix T, et al. GATA Factor-Mediated Gene Regulation in Human  
295 Erythropoiesis. *iScience*. 2020;23(4):.



- 296 2. Hsiao T, Conant D, Rossi N, et al. Inference of CRISPR Edits from Sanger Trace Data.  
297 *BioRxiv*. 2018;
- 298 3. Dang Y, Jia G, Choi J, et al. Optimizing sgRNA structure to improve CRISPR-Cas9 knockout  
299 efficiency. *Genome Biology*. 2015;15;16:280.
- 300 4. Cottle RN, Lee CM, Archer D, Bao G. Controlled delivery of  $\beta$ -globin-targeting TALENs and  
301 CRISPR/Cas9 into mammalian cells for genome editing using microinjection. *Sci Rep*. 2015;5:.
- 302 5. Liang P, Xu Y, Zhang X, et al. CRISPR/Cas9-mediated gene editing in human tripronuclear  
303 zygotes. *Protein Cell*. 2015;6(5):363–372.
- 304 6. Huang X, Wang Y, Yan W, et al. Production of Gene-Corrected Adult Beta Globin Protein in  
305 Human Erythrocytes Differentiated from Patient iPSCs After Genome Editing of the Sickle Point  
306 Mutation: Corrected  $\beta$  Globin in Genome-Edited Human iPSCs. *Ste*. 2015;33(5):1470–1479.
- 307 7. Kurita R, Suda N, Sudo K, et al. Establishment of Immortalized Human Erythroid Progenitor  
308 Cell Lines Able to Produce Enucleated Red Blood Cells. *PLoS One*. 2013;8(3):.
- 309 8. Antoniani C, Meneghini V, Lattanzi A, et al. Induction of fetal hemoglobin synthesis by  
310 CRISPR/Cas9-mediated editing of the human  $\beta$ -globin locus. *Blood*. 2018;131(17):1960–1973.
- 311 9. Lin H-T, Okumura T, Yatsuda Y, et al. Application of Droplet Digital PCR for Estimating  
312 Vector Copy Number States in Stem Cell Gene Therapy. *Hum Gene Ther Methods*. 2016;27(5):197–  
313 208.
- 314 10. Brinkman EK, van Steensel B. Rapid Quantitative Evaluation of CRISPR Genome Editing by  
315 TIDE and TIDER. *Methods Mol. Biol*. 2019;1961:29–44.
- 316 11. Brinkman EK, Chen T, Amendola M, van Steensel B. Easy quantitative assessment of genome  
317 editing by sequence trace decomposition. *Nucleic Acids Res*. 2014;42(22):e168.
- 318 12. Cradick TJ, Qiu P, Lee CM, Fine EJ, Bao G. COSMID: A Web-based Tool for Identifying  
319 and Validating CRISPR/Cas Off-target Sites. *Mol Ther Nucleic Acids*. 2014;3(12):e214.
- 320 13. Tsai SQ, Zheng Z, Nguyen NT, et al. GUIDE-seq enables genome-wide profiling of off-target  
321 cleavage by CRISPR-Cas nucleases. *Nature Biotechnology*. 2015;33(2):187–197.

- 322 14. Weber L, Frati G, Felix T, et al. Editing a  $\gamma$ -globin repressor binding site restores fetal  
323 hemoglobin synthesis and corrects the sickle cell disease phenotype. *Sci. Adv.* 2020;6(7):eaay9392.
- 324 15. Lattanzi A, Meneghini V, Pavani G, et al. Optimization of CRISPR/Cas9 Delivery to Human  
325 Hematopoietic Stem and Progenitor Cells for Therapeutic Genomic Rearrangements. *Molecular*  
326 *Therapy.* 2018;
- 327 16. Pinello L, Canver MC, Hoban MD, et al. Analyzing CRISPR genome-editing experiments  
328 with CRISPResso. *Nature Biotechnology.* 2016;34(7):695–697.
- 329
